# Supplementary material for: Effects of Structure of Rho GTPase-activating Protein DLC-1 on Cell Morphology and Migration
Source: PubMed Central journal article supplement — J Biol Chem. 2008 Nov 21;283(47):32762–70. doi: 10.1074/jbc.M800617200 (PMC2583296; doi:10.1074/jbc.m800617200), 2008-11-21
Supplement: M800617200_1.pdf [file M800617200_1.pdf]

**Figure Legends for Supplementary Figures.**

**Supplementary Fig. 1.** GAP activity is critical for the morphological changes induced by DLC-1. Versions of pEGFP-DLC-1  $\Delta$ SAM with inactivating mutations in the GAP domain (R677E, K714E, K718E) were transfected into MDA-MB-468 cells and localization and morphology observed by a confocal fluorescence microscope. Scale bar, 10  $\mu$ M.

**Supplementary Fig. 2.** Definition of the functional DLC-1 GAP domain. A, The DLC-1 amino acid sequence was analyzed by using the PROF structure prediction algorithm. The consensus RhoGAP domain with some flanking sequences at both ends and START domain consist of  $\alpha$ -helix and  $\beta$ -sheet structures, respectively. B,C, Since transfection of an active DLC-1 RhoGAP caused major changes in cell morphology we used this to delineate the boundaries of the functional RhoGAP domain. The effects of a series of amino-terminal or carboxyl-terminal truncations of DLC-1 (see figure) on cell morphology was examined. MDA-MB-468 cells grown on glass coverslips were transiently transfected with EGFP-tagged (B) amino-terminal or (C) carboxyl-terminal truncation mutants of DLC-1 and imaged by fluorescence microscopy.

**Supplementary Fig. 3.** Expression of DLC-1 constructs. Several EGFP-DLC-1 truncation and mis-sense mutant constructs were transfected into HEK293 cells. Protein expression was via western blotting with anti-GFP antibody.

**Supplementary Fig. 4.** DLC-1 induces cellular protrusions. HEK293 cells were transiently transfected with pEGFP-DLC-1  $\Delta$ SAM and observed via live cell imaging. Cells that were immobile but exhibited extending protrusions were followed over a 20-30 min time period. The image shown is typical of the majority of cells expressing DLC-1  $\Delta$ SAM; this type of behavior was never seen in control transfectants.

**Supplementary Figures 5,6,7** show multiple images of vinculin staining in MDA-MB-468 cells transiently expressing DLC-1  $\Delta$ SAM, DLC-1  $\Delta$ N, and DLC-1 RhoGAP, respectively.

**Supplementary Figures 8i and 9** are vinculin staining in MDA-MB-468 cells transiently expressing DLC-1 FL and DLC-1N, respectively, showing focal adhesion localization of these proteins. In Figure 8ii are additional MDA-MB-468 cells expressing DLC-1 FL in an apparent focal adhesion localization pattern.

**Supplementary Figure 10** illustrates apparent focal adhesion localization in multiple MDA-MB-468 cells stably expressing DLC-1 FL

**Supplementary Table 1** summarizes subcellular localization of DLC-1 and presence or absence of focal adhesions in cells transiently transfected with the indicated DLC-1 constructs.
