# Supplementary material for: Effects of Structure of Rho GTPase-activating Protein DLC-1 on Cell Morphology and Migration
Source: PubMed Central journal article supplement — J Biol Chem. 2008 Nov 21;283(47):32762–70. doi: 10.1074/jbc.M800617200 (PMC2583296; doi:10.1074/jbc.m800617200), 2008-11-21
Supplement: M800617200_2.pdf [file M800617200_2.pdf]

Supp. Fig 1.

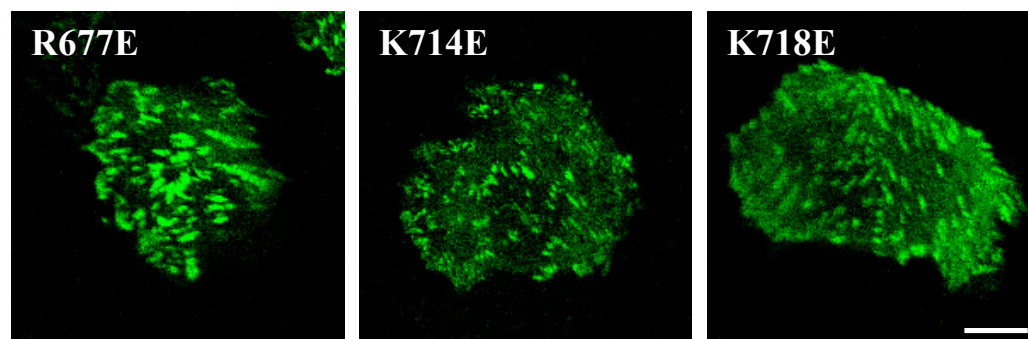

Supp. Fig. 2

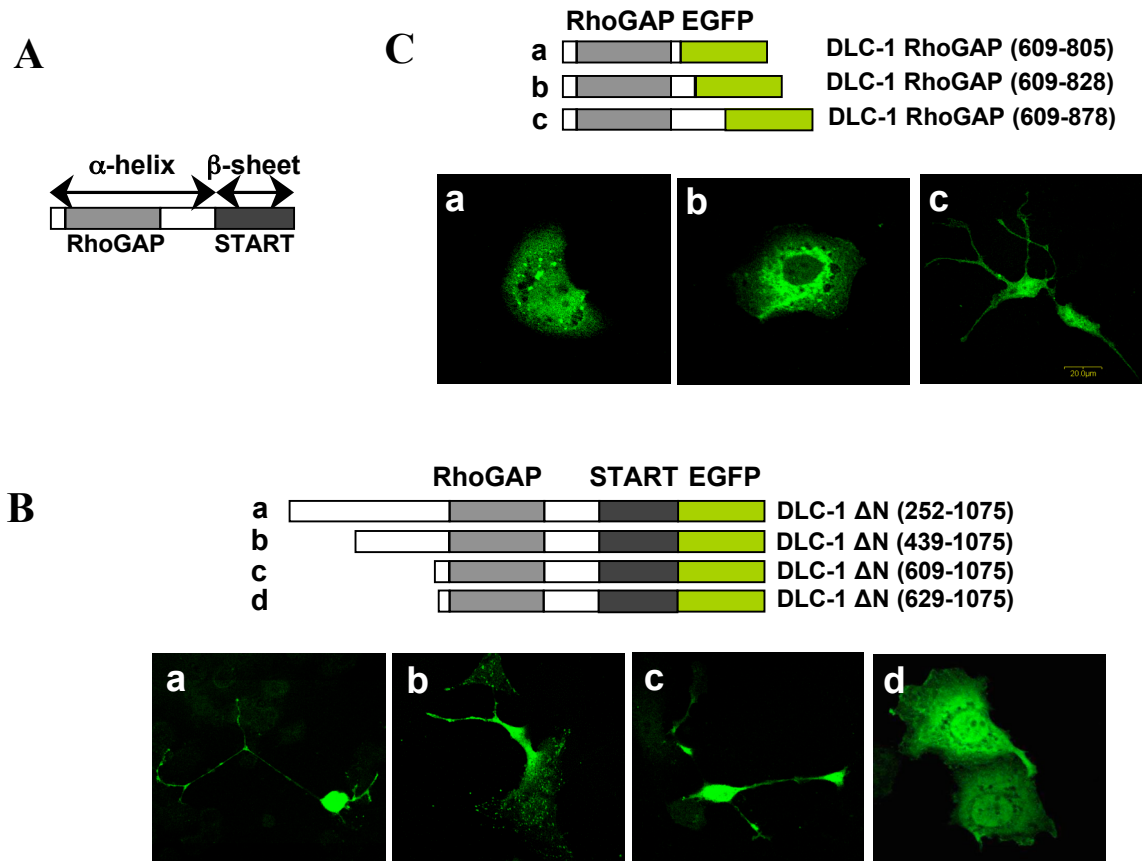

Supp. Fig. 3

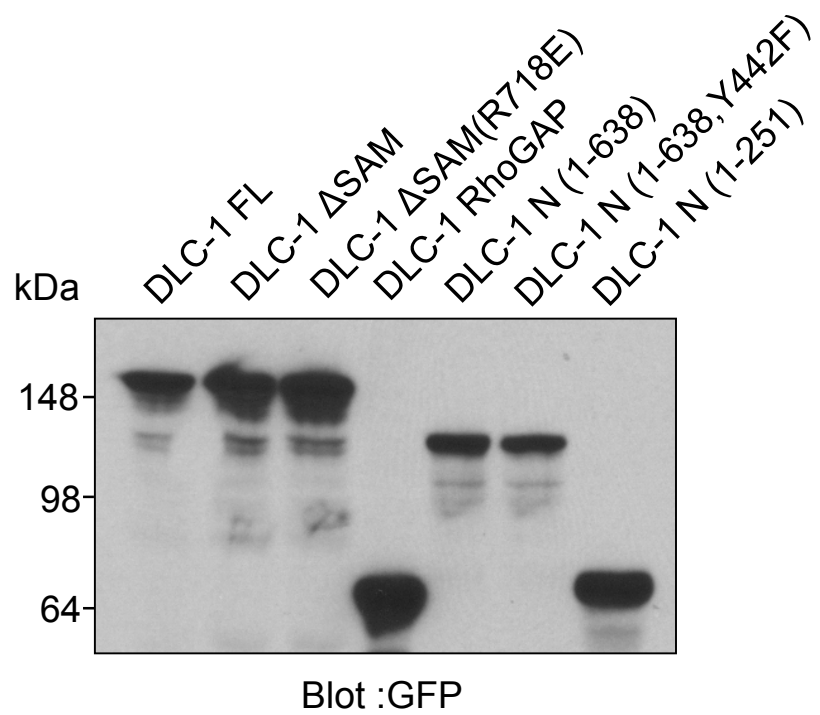

Supp. Fig. 4

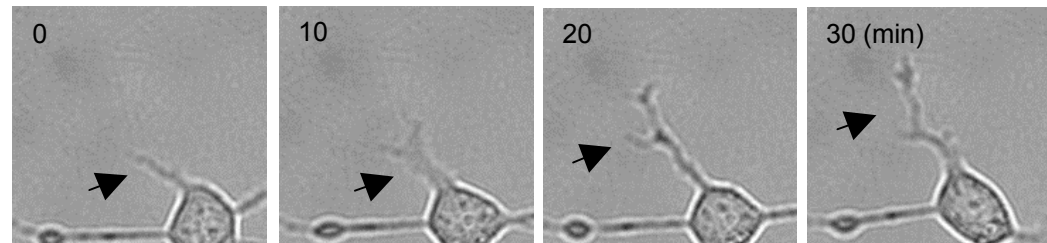

Supp  
Fig 5

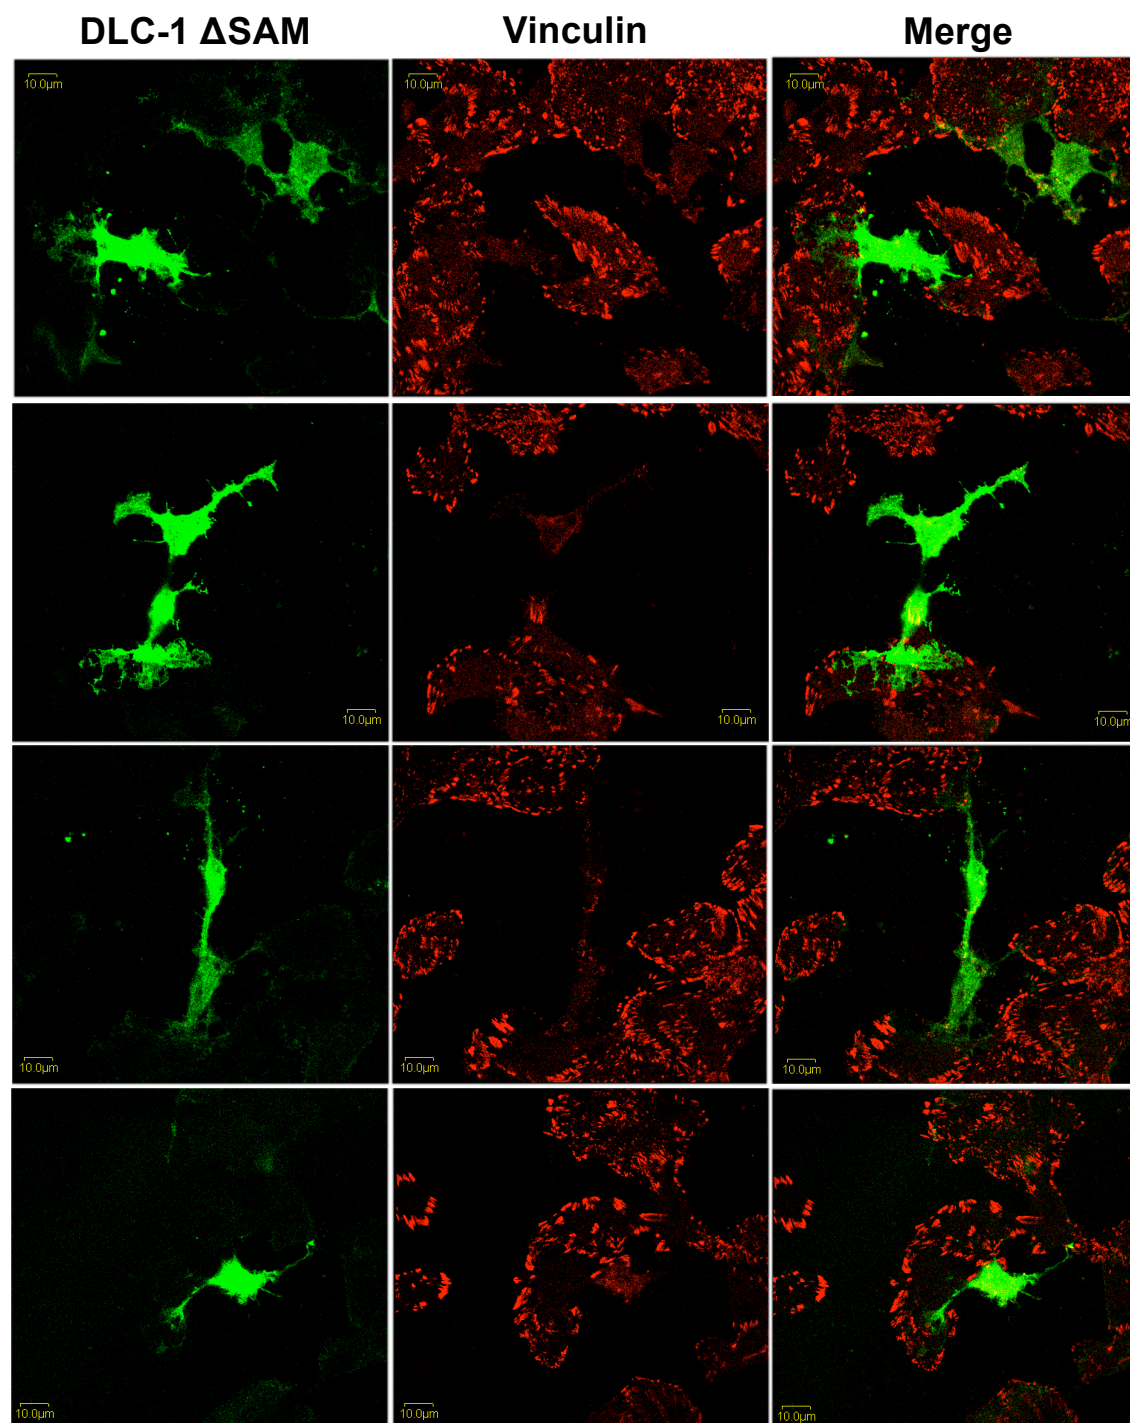

Supp  
Fig 6

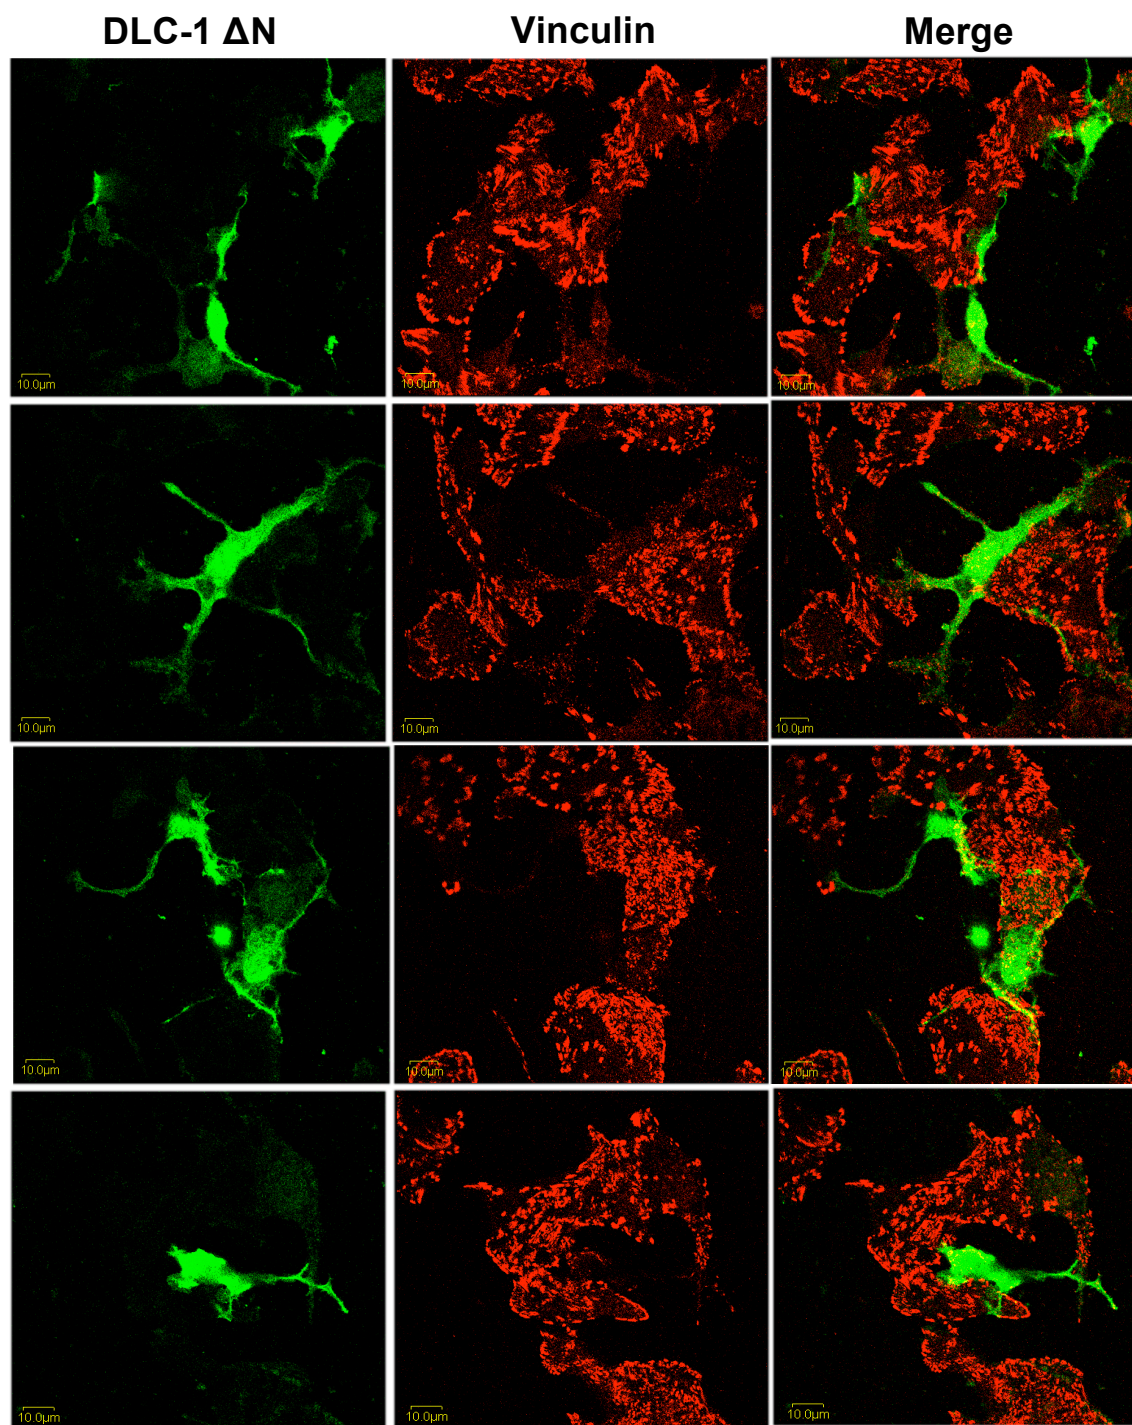



Supp  
Fig 7

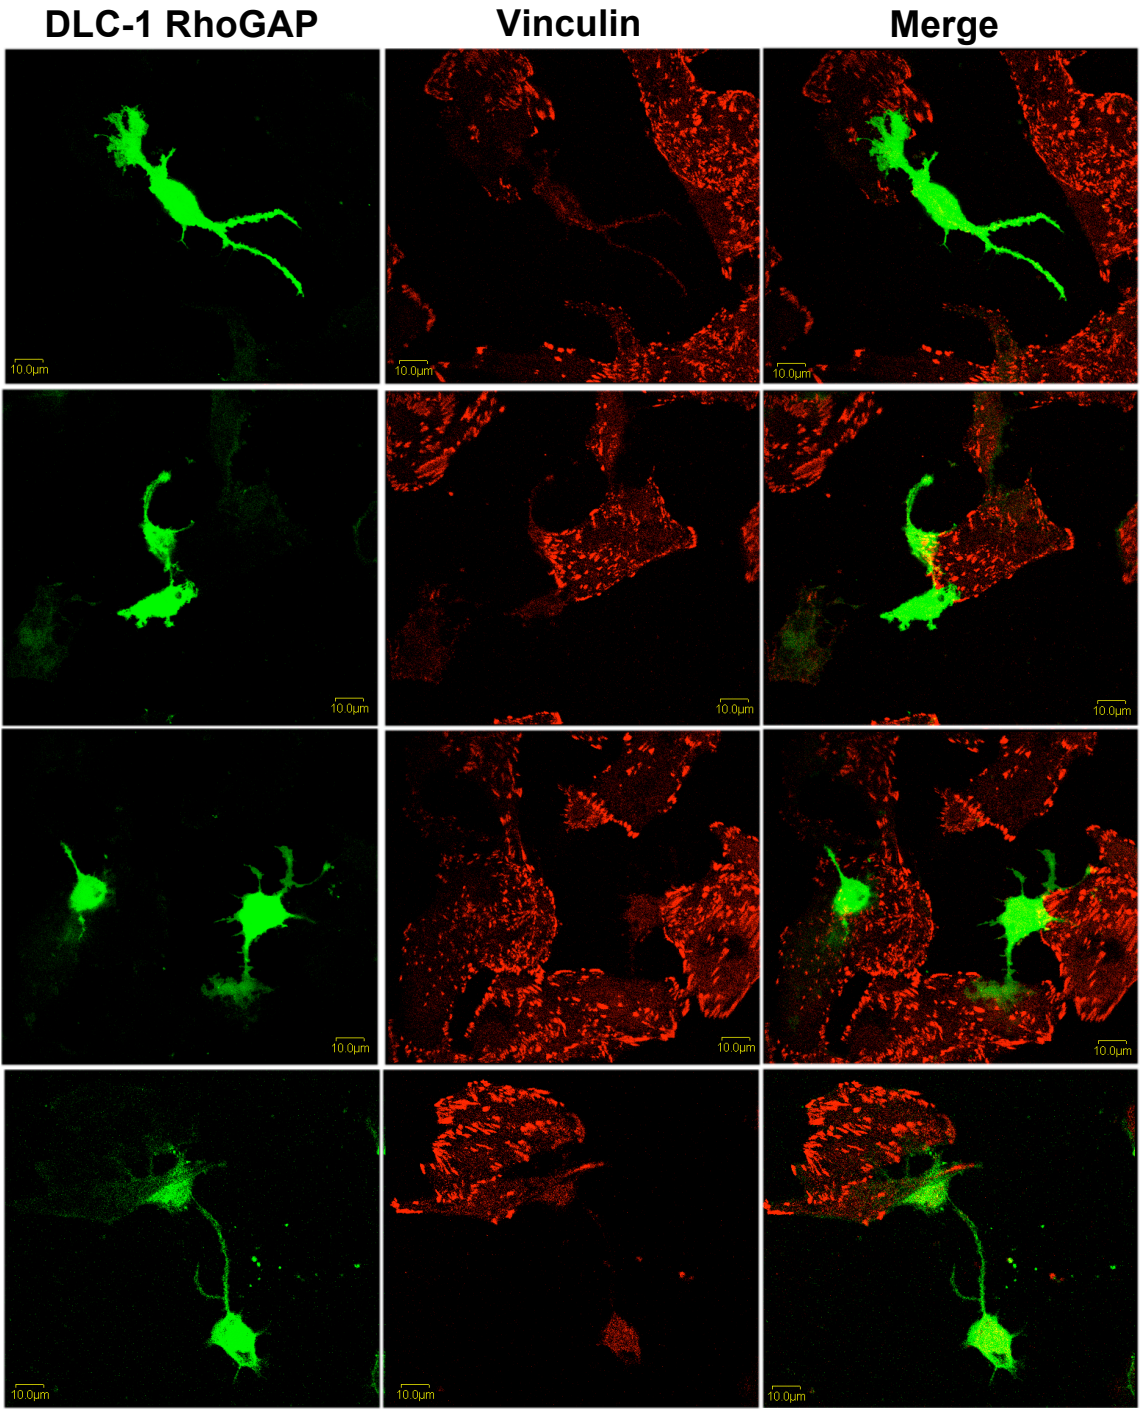

Supp Fig 8

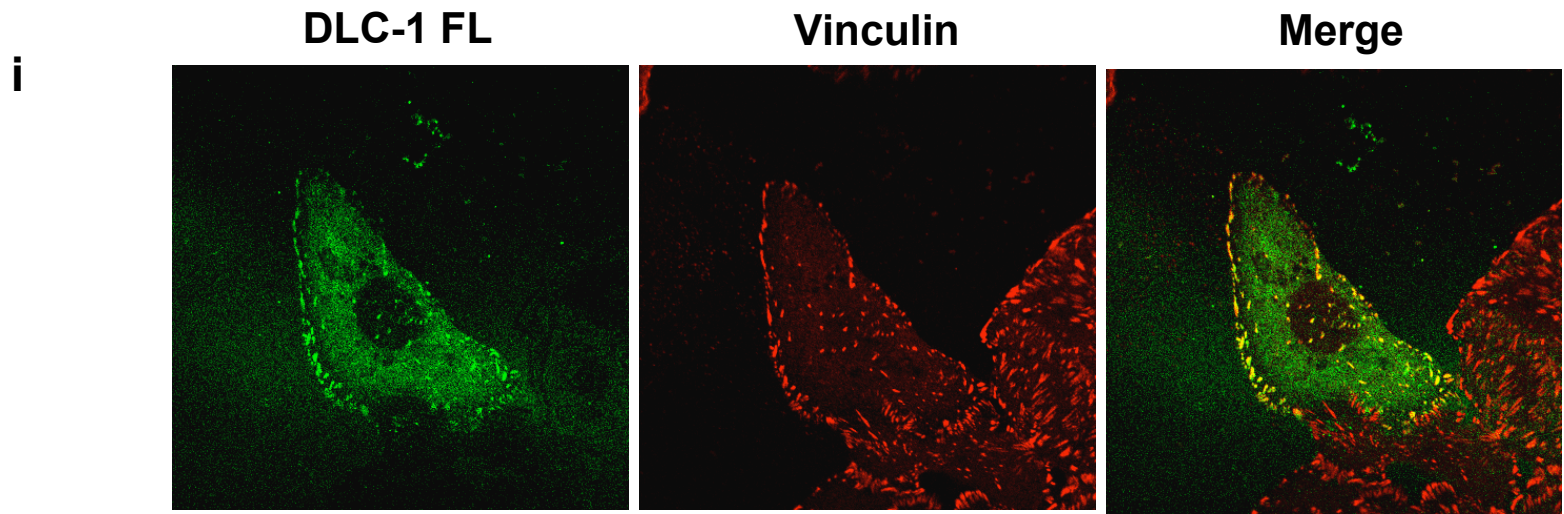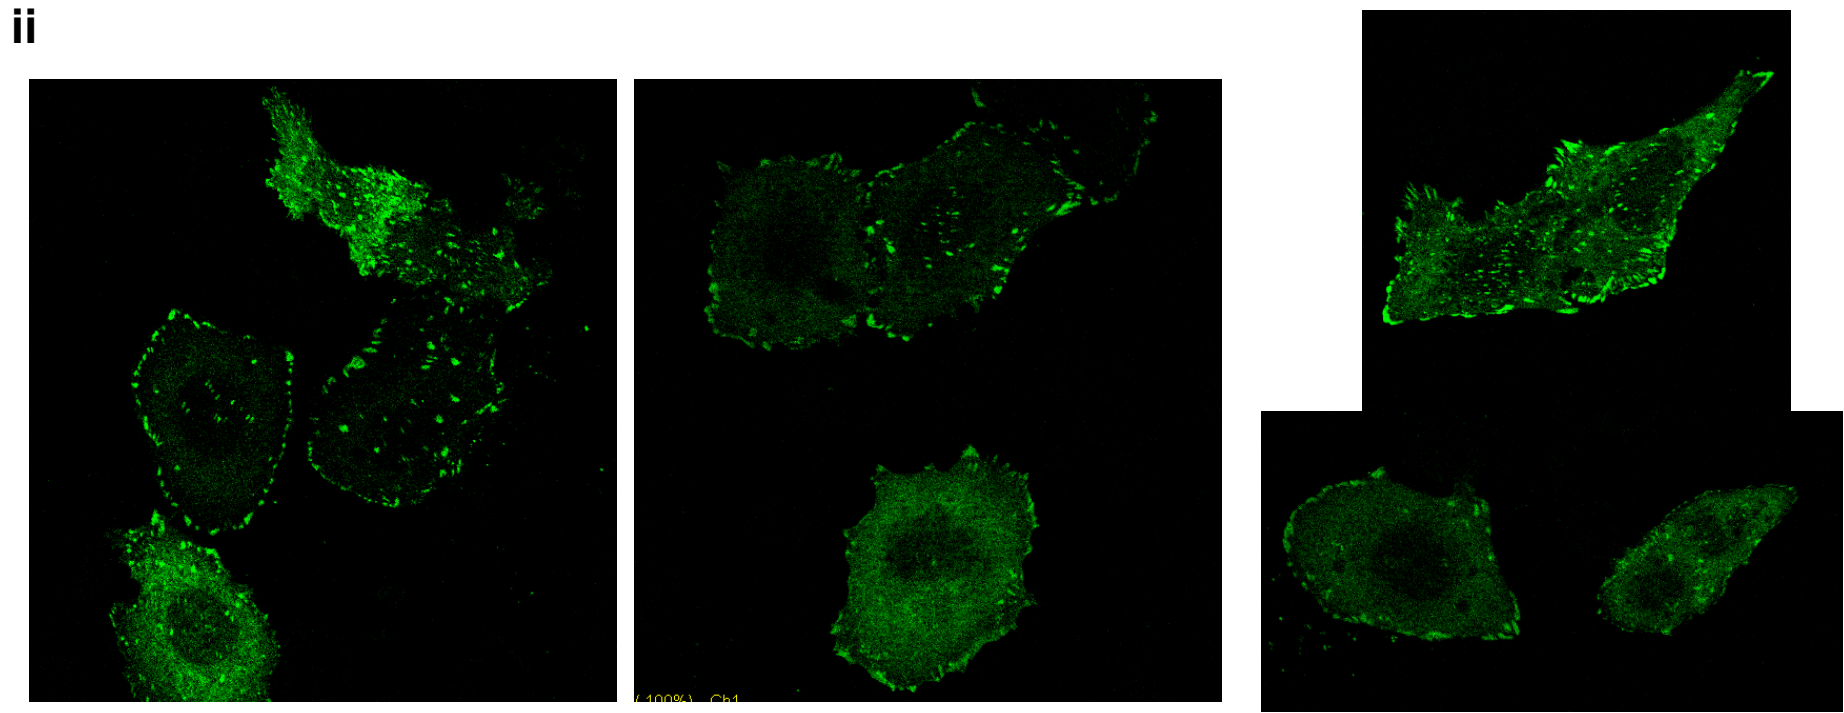



# Supp Fig 9

DLC-1 N

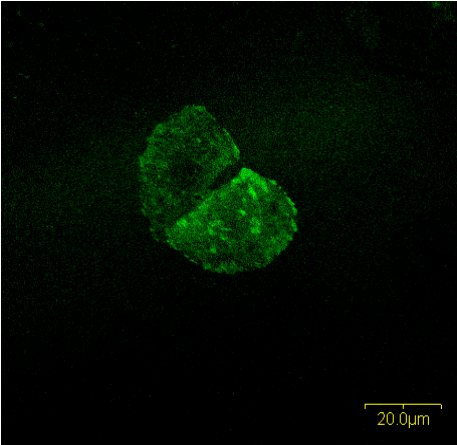

Vinculin

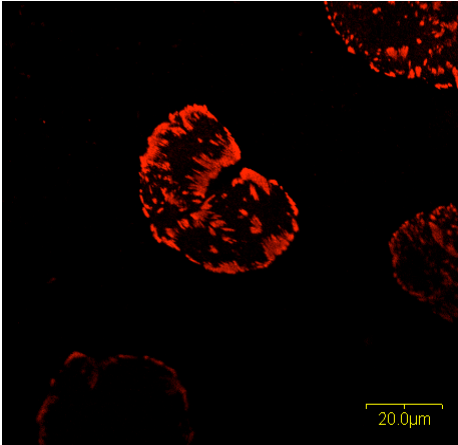

Merge

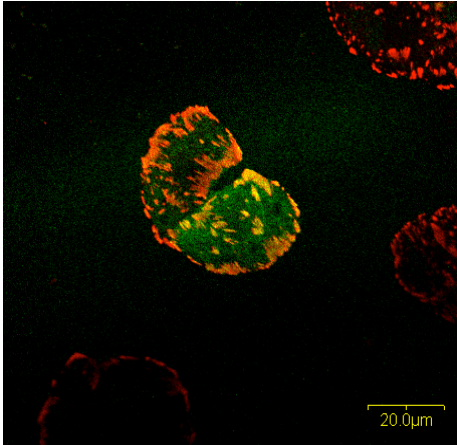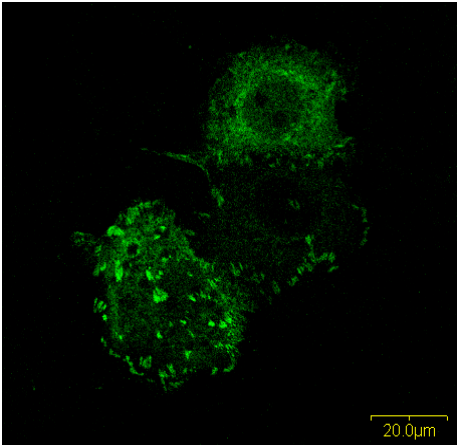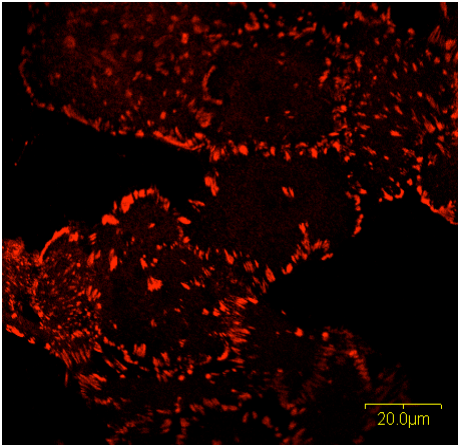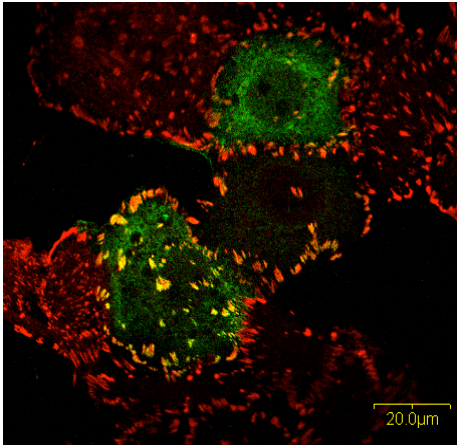

## Supp Fig 10

### MDA-MB-468 cells stably expressing DLC-1 FL

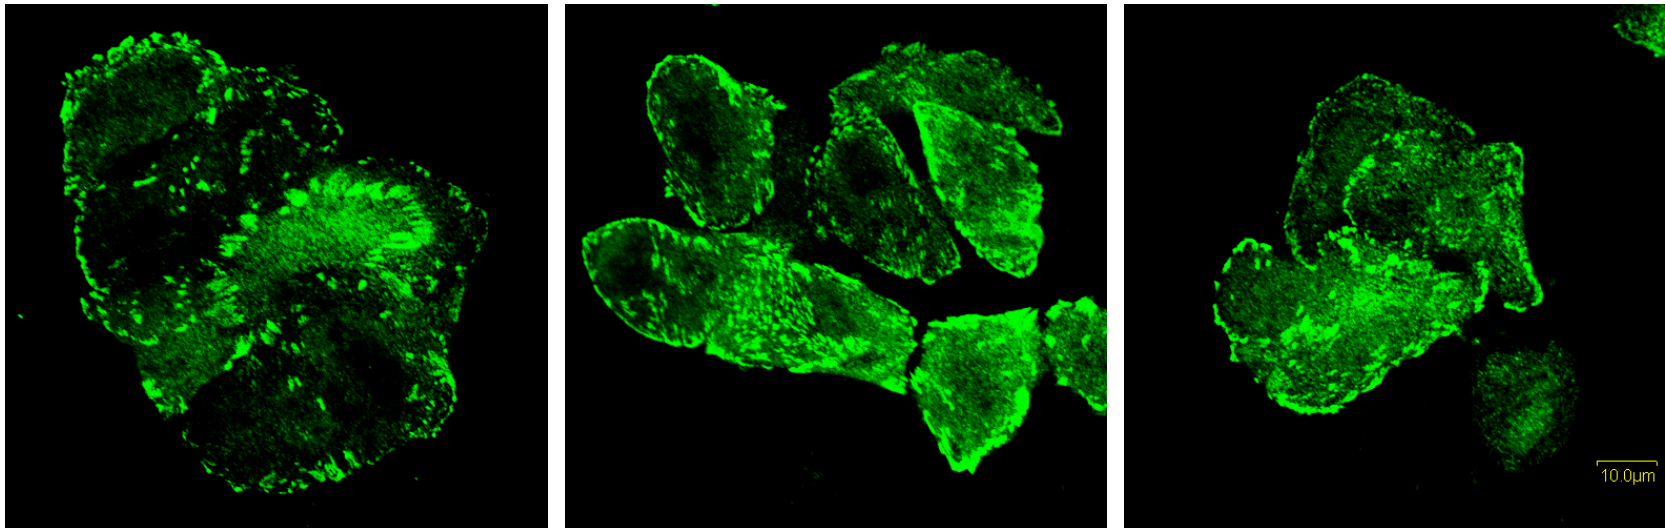

Retrovirus of the pBabe-puro vectors encoding DLC-1 FL was generated and used to infect the MDA-MB-468 cells. After selection in growth medium containing 1.0 mg/ml puromycin, multiple drug resistant colonies were pooled together to establish mass populations stably expressing each DLC-1 protein.

## Supplementary Table1

|                    | Cytoplasm localization | Focal adhesion localization | Loss of FA |
|--------------------|------------------------|-----------------------------|------------|
| GFP                | ~100%                  | 0%                          | 0%         |
| DLC-1 FL           | 50~90%                 | 10~50%                      | ~10%       |
| DLC-1 $\Delta$ SAM | ~95%                   | ~5%                         | ~95%       |
| DLC-1 $\Delta$ N   | ~100%                  | 0%                          | ~95%       |
| DLC-1 START        | ~100%                  | 0%                          | 0%         |
| DLC-1 N1           | 50~90%                 | 10~50%                      | 0%         |
| DLC-1 SAM          | ~100%                  | 0%                          | 0%         |
| DLC-1 RhoGAP       | ~100%                  | 0%                          | ~95%       |

The Table summarizes observations on 20-50 transfected cells for each construct. Loss of Focal Adhesions was judged by vinculin staining.
